# Supplementary material for: Fabrication and Characterisation of Hydrogels with Reversible Wrinkled Surfaces for Limbal Study and Reconstruction
Source: MDPI journal article supplement (doi:10.3390/gels9110915), 2023-11-18
Supplement: s1 [file s1]

## Supplementary Materials

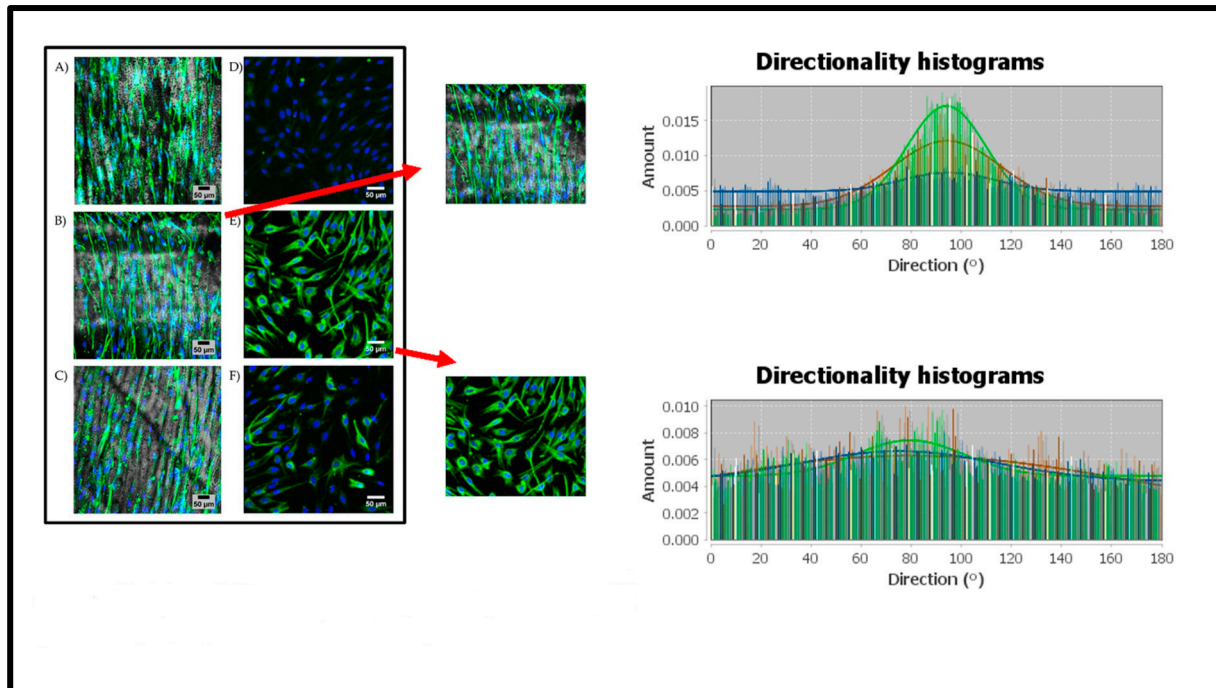

**Figure S1:** Imagej analysis to quantify the cell alignment on the wrinkled substrates , expressed as the number of features against the orientation in degrees in comparisonon the control cultures.

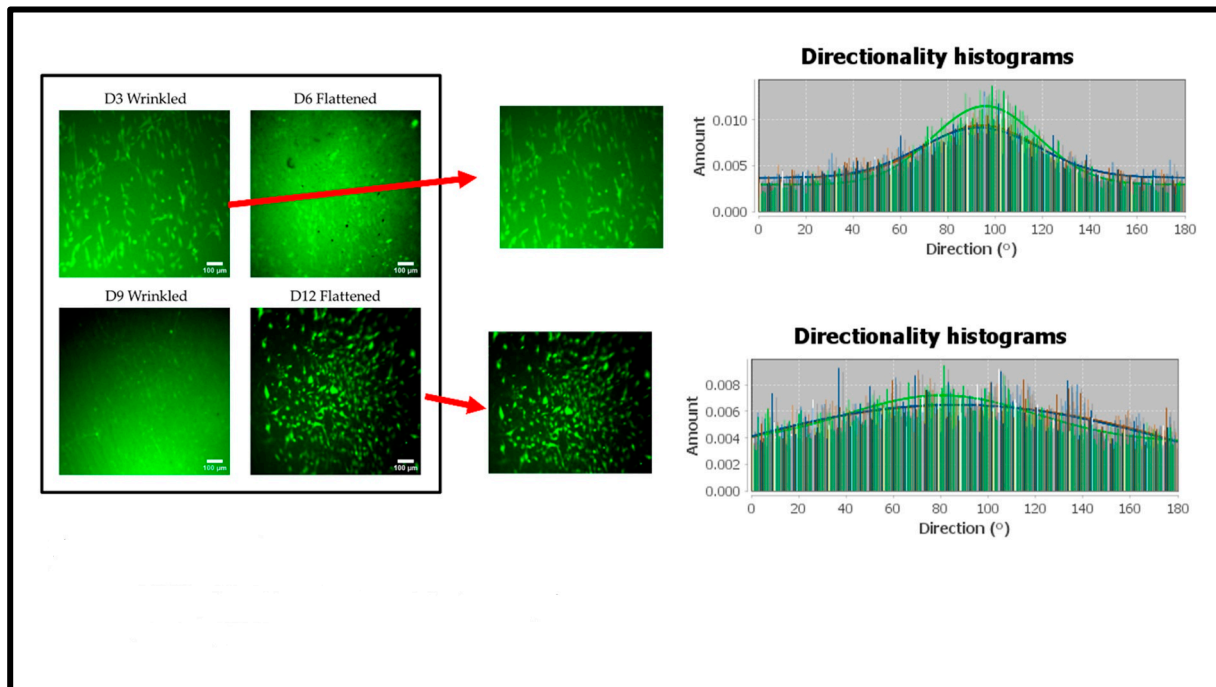

**Figure S2:** Imagej analysis to quantify the cell alignment on the wrinkled substrates (D3 ) and flattened substrate( D12 ) , expressed as the number of features against theorientation in degrees.
